# Supplementary material for: Blackcurrant Anthocyanins Increase the Levels of Collagen, Elastin, and Hyaluronic Acid in Human Skin Fibroblasts and Ovariectomized Rats
Source: PubMed Central journal article supplement (PMC5946280; doi:10.3390/nu10040495), 2018-04-16
Supplement: nutrients-10-00495-s001.pdf [file nutrients-10-00495-s001.pdf]

**Supplementary Materials**
**Table S1.** Effects of BCE on estradiol-regulated gene expression in TIG113 cells.

| <b>Gene Symbol</b>  | <b>Gene Name</b>                                                  | <b>Fold Change</b> |
|---------------------|-------------------------------------------------------------------|--------------------|
| <i>IGFBP2</i>       | insulin like growth factor binding protein 2                      | 115.3              |
| <i>IGF2</i>         | insulin like growth factor 2                                      | 26.6               |
| <i>WNT11</i>        | Wnt family member 11                                              | 16.9               |
| <i>AQP1</i>         | aquaporin 1                                                       | 16.7               |
| <i>TTR</i>          | transthyretin                                                     | 14.2               |
| <i>EGR2</i>         | early growth response 2                                           | 12.3               |
| <i>CLCA2</i>        | chloride channel accessory 2                                      | 10.5               |
| <i>WNT5A</i>        | Wnt family member 5A                                              | 8.4                |
| <i>PLXDC1</i>       | plexin domain containing 1                                        | 7.7                |
| <i>CRABP2</i>       | cellular retinoic acid binding protein 2                          | 7.6                |
| <i>LTBP1</i>        | latent transforming growth factor beta binding protein 1          | 7.5                |
| <i>TH</i>           | tyrosine hydroxylase                                              | 6.4                |
| <i>SFRP1</i>        | secreted frizzled related protein 1                               | 6.2                |
| <i>PK4</i>          | pyruvate dehydrogenase kinase 4                                   | 5.9                |
| <i>TACSTD2</i>      | tumor associated calcium signal transducer 2                      | 5.7                |
| <i>TIMP3</i>        | tissue inhibitor of metalloproteinase 3                           | 5.7                |
| <i>EGR1</i>         | early growth response 1                                           | 5.2                |
| <i>INHBA</i>        | inhibin beta A subunit                                            | 5.0                |
| <i>COLEC12</i>      | collectin subfamily member 12                                     | 4.7                |
| <i>ST8SIA1</i>      | ST8 alpha-N-acetyl-neuraminide                                    | 4.4                |
| <i>TRIB2</i>        | tribbles pseudokinase 2                                           | 3.7                |
| <i>TMEM2</i>        | transmembrane protein 2                                           | 3.4                |
| <i>PLAU</i>         | plasminogen activator, urokinase                                  | 3.3                |
| <i>SPRY1</i>        | sprouty RTK signaling antagonist 1                                | 3.1                |
| <i>TIAM1</i>        | T-cell lymphoma invasion and metastasis 1                         | 3.1                |
| <i>LOXL4</i>        | lysyl oxidase like 4                                              | 3.0                |
| <i>TFAP2C</i>       | transcription factor AP-2 gamma                                   | 2.8                |
| <i>NR2F1</i>        | nuclear receptor subfamily 2 group F member 1                     | 2.7                |
| <i>NEDD9</i>        | neural precursor cell expressed, developmentally down-regulated 9 | 2.7                |
| <i>PTGER3</i>       | prostaglandin E receptor 3                                        | 2.6                |
| <i>TP53I11</i>      | tumor protein p53 inducible protein 11                            | 2.6                |
| <i>CFB</i>          | complement factor B                                               | 2.6                |
| <i>FBLN1</i>        | fibulin 1                                                         | 2.6                |
| <i>PENK</i>         | proenkephalin                                                     | 2.5                |
| <i>HLA-DRB1</i>     | major histocompatibility complex, class II, DR beta 1             | 2.4                |
| <i>VEGFA</i>        | vascular endothelial growth factor A                              | 2.4                |
| <i>CTGF</i>         | connective tissue growth factor                                   | 2.3                |
| <i>THBS4</i>        | thrombospondin 4                                                  | 2.2                |
| <i>KLF10</i>        | kruppel like factor 10                                            | 2.2                |
| <i>IGFBP5</i>       | insulin like growth factor binding protein 5                      | 2.1                |
| <i>MAOA</i>         | monoamine oxidase A                                               | 2.1                |
| <i>TGFB3</i>        | transforming growth factor beta 3                                 | 2.1                |
| <i>ITGA1</i>        | integrin subunit alpha 1                                          | 2.1                |
| <i>LOC102724428</i> | serine/threonine-protein kinase SIK1                              | 2.1                |
| <i>PITX1</i>        | paired like homeodomain 1                                         | 2.0                |
| <i>VDR</i>          | vitamin D receptor                                                | 2.0                |
| <i>KLF6</i>         | kruppel like factor 6                                             | -2.2               |

Table S2. Effects of BCE on ESR1-regulated gene expression in TIG113 cells.

| Gene Symbol                | Gene Name                                                        | Fold Change |
|----------------------------|------------------------------------------------------------------|-------------|
| <i>IGFBP2</i>              | insulin like growth factor binding protein 2                     | 115.3       |
| <i>WNT11</i>               | Wnt family member 11                                             | 16.9        |
| <i>ROBO2</i>               | roundabout guidance receptor 2                                   | 8.0         |
| <i>PLXDC1</i>              | plexin domain containing 1                                       | 7.7         |
| <i>CRABP2</i>              | cellular retinoic acid binding protein 2                         | 7.6         |
| <i>LTBP1</i>               | latent transforming growth factor beta binding protein 1         | 7.5         |
| <i>MAP2</i>                | microtubule associated protein 2                                 | 6.2         |
| <i>PDK4</i>                | pyruvate dehydrogenase kinase 4                                  | 5.9         |
| <i>EPHX4</i>               | epoxide hydrolase 4                                              | 5.7         |
| <i>ANK3</i>                | ankyrin 3                                                        | 5.6         |
| <i>EGR1</i>                | early growth response 1                                          | 5.2         |
| <i>FGFR2</i>               | fibroblast growth factor receptor 2                              | 4.8         |
| <i>ICOSLG/LOC102723996</i> | inducible T-cell costimulator ligand                             | 4.6         |
| <i>VAV3</i>                | vav guanine nucleotide exchange factor 3                         | 4.2         |
| <i>ODF3B</i>               | outer dense fiber of sperm tails 3B                              | 3.9         |
| <i>CCL2</i>                | C-C motif chemokine ligand 2                                     | 3.5         |
| <i>CHST2</i>               | carbohydrate sulfotransferase 2                                  | 3.4         |
| <i>TMEM2</i>               | transmembrane protein 2                                          | 3.4         |
| <i>PLAU</i>                | plasminogen activator, urokinase                                 | 3.3         |
| <i>CEBPA</i>               | CCAAT/enhancer binding protein alpha                             | 3.2         |
| <i>ASS1</i>                | argininosuccinate synthase 1                                     | 3.2         |
| <i>CPE</i>                 | carboxypeptidase E                                               | 3.1         |
| <i>LOXL4</i>               | lysyl oxidase like 4                                             | 3.0         |
| <i>TGM2</i>                | transglutaminase 2                                               | 3.0         |
| <i>PDGFD</i>               | platelet-derived growth factor D                                 | 2.9         |
| <i>TFAP2C</i>              | transcription factor AP-2 gamma                                  | 2.8         |
| <i>NEDD9</i>               | neural precursor cell expressed, developmentally downregulated 9 | 2.7         |
| <i>PTGER3</i>              | prostaglandin E receptor 3                                       | 2.6         |
| <i>TP53I11</i>             | tumor protein p53 inducible protein 11                           | 2.6         |
| <i>FBLN1</i>               | fibulin 1                                                        | 2.6         |
| <i>PRKCH</i>               | protein kinase C eta                                             | 2.5         |
| <i>MME</i>                 | membrane metalloendopeptidase                                    | 2.4         |
| <i>VEGFA</i>               | vascular endothelial growth factor A                             | 2.4         |
| <i>SLC39A8</i>             | solute carrier family 39 member 8                                | 2.4         |
| <i>THRB</i>                | thyroid hormone receptor beta                                    | 2.3         |
| <i>DOCK4</i>               | dedicator of cytokinesis 4                                       | 2.3         |
| <i>THBS4</i>               | thrombospondin 4                                                 | 2.2         |
| <i>IER3</i>                | immediate early response 3                                       | 2.2         |
| <i>SERPINB9</i>            | serpin family B member 9                                         | 2.2         |
| <i>IGFBP5</i>              | insulin like growth factor binding protein 5                     | 2.1         |
| <i>CSAD</i>                | cysteine sulfinic acid decarboxylase                             | 2.1         |
| <i>TGFB3</i>               | transforming growth factor beta 3                                | 2.1         |
| <i>TMSB15A</i>             | thymosin beta 15a                                                | 2.1         |
| <i>PLCE1</i>               | phospholipase C epsilon 1                                        | -2.0        |
| <i>PRLR</i>                | prolactin receptor                                               | -2.0        |
| <i>S100P</i>               | S100 calcium binding protein P                                   | -2.0        |
| <i>SLC7A5</i>              | solute carrier family 7 member 5                                 | -2.1        |
| <i>GSG1</i>                | germ cell associated 1                                           | -2.1        |
| <i>TM4SF1</i>              | transmembrane 4 L six family member 1                            | -2.3        |
| <i>KRT19</i>               | keratin 19                                                       | -2.4        |

**Table S3.** Effects of BCE on TGF $\beta$ 1-regulated gene expression in TIG113 cells.

| Gene Symbol    | Gene Name                                                              | Fold Change |
|----------------|------------------------------------------------------------------------|-------------|
| <i>WNT11</i>   | Wnt family member 11                                                   | 16.9        |
| <i>ASPN</i>    | asporin                                                                | 15.7        |
| <i>RASGRP3</i> | RAS guanyl-releasing protein 3                                         | 9.5         |
| <i>WNT5A</i>   | Wnt family member 5A                                                   | 8.4         |
| <i>LTBP1</i>   | latent transforming growth factor beta binding protein 1               | 7.5         |
| <i>TIMP3</i>   | TIMP metalloproteinase inhibitor 3                                     | 5.7         |
| <i>RGCC</i>    | regulator of cell cycle                                                | 5.2         |
| <i>EGR1</i>    | early growth response 1                                                | 5.2         |
| <i>INHBA</i>   | inhibin beta A subunit                                                 | 5.0         |
| <i>OLFM2</i>   | olfactomedin 2                                                         | 4.7         |
| <i>ANGPTL4</i> | angiopoietin like 4                                                    | 3.8         |
| <i>NOX4</i>    | NADPH oxidase 4                                                        | 3.7         |
| <i>CCL2</i>    | C-C motif chemokine ligand 2                                           | 3.5         |
| <i>PLAU</i>    | plasminogen activator, urokinase                                       | 3.3         |
| <i>CEBPA</i>   | CCAAT/enhancer binding protein alpha                                   | 3.2         |
| <i>PIM1</i>    | Pim-1 proto-oncogene, serine/threonine kinase                          | 3.2         |
| <i>ASS1</i>    | argininosuccinate synthase 1                                           | 3.2         |
| <i>PRDM1</i>   | PR/SET domain 1                                                        | 3.1         |
| <i>TGM2</i>    | transglutaminase 2                                                     | 3.0         |
| <i>TNC</i>     | tenascin C                                                             | 2.8         |
| <i>NEDD9</i>   | neural precursor cell expressed, developmentally downregulated 9       | 2.7         |
| <i>COL7A1</i>  | collagen type VII alpha 1 chain                                        | 2.6         |
| <i>CD14</i>    | CD14 molecule                                                          | 2.5         |
| <i>CAMK2N1</i> | calcium/calmodulin dependent protein kinase II inhibitor 1             | 2.4         |
| <i>FERMT1</i>  | fermitin family member 1                                               | 2.4         |
| <i>VEGFA</i>   | vascular endothelial growth factor A                                   | 2.4         |
| <i>PMEPA1</i>  | prostate transmembrane protein, androgen induced 1                     | 2.3         |
| <i>DOCK4</i>   | dedicator of cytokinesis 4                                             | 2.3         |
| <i>CTGF</i>    | connective tissue growth factor                                        | 2.3         |
| <i>IER3</i>    | immediate early response 3                                             | 2.2         |
| <i>KLF10</i>   | kruppel like factor 10                                                 | 2.2         |
| <i>FABP5</i>   | fatty acid binding protein 5                                           | 2.1         |
| <i>ITGA1</i>   | integrin subunit alpha 1                                               | 2.1         |
| <i>INPP5D</i>  | inositol polyphosphate-5-phosphatase D                                 | 2.1         |
| <i>PIK3CD</i>  | phosphatidylinositol-4,5-bisphosphate 3-kinase catalytic subunit delta | 2.0         |
| <i>VDR</i>     | vitamin D receptor                                                     | 2.0         |
